# Supplementary material for: Alkenylation of allylic alcohols using alkenylboron dihalides: a formal transition-metal free Suzuki reaction
Source: Royal Society of Chemistry journal article supplement (doi:10.1039/b502026c), 2005-01-01
Supplement: b502026c.pdf [file b502026c.pdf]

### Supporting information

**General Methods:** All reagents were used as received. Column chromatography was performed using silica gel (60 Å, 230–400 mesh, ICN Biomedicals GmbH, Eschwege, Germany). Analytical thin-layer chromatography was performed using 250 µm silica (Analtech, Inc., Newark, DE).

### Experimental

Boron trihalide (1.5 mmol), alkyne (1.5 mmol) and dry dichloromethane (8 mL) were combined in a 50 mL flask and stirred for 1 hour under a nitrogen atmosphere. In a separate flask, the allylic alcohol (1.6 mmol) in dry dichloromethane (8 mL) was treated with *n*-butyllithium (1.0 mL of a 1.6 M solution in hexane) at 0°C and stirred at room temperature for 1 hour. The solution was then transferred to the first flask and allowed to stir at room temperature overnight. Water (20 mL) was added and the reaction mixture was extracted with ethyl acetate and dried over anhydrous MgSO<sub>4</sub>. The solvents were removed under reduced pressure and the product purified by silica gel column chromatography using hexane as an eluent.

<sup>1</sup>H NMR and <sup>13</sup>C NMR spectra were recorded at 250.13 and 62.89 MHz, respectively. Chemical shifts for <sup>1</sup>H NMR and <sup>13</sup>C NMR spectra (CDCl<sub>3</sub>) were referenced to TMS. Microanalysis was performed by Atlantic Microlab, Inc. Norcross, Georgia.

**Product 3a:** <sup>1</sup>H NMR (250 MHz, CDCl<sub>3</sub>): δ 7.57–7.60 (m, 2H), 7.15–7.37 (m, 13H), 6.34–6.58 (m, 3H), 4.94 (dd, *J* = 8.98 and 8.88 Hz, 1H). <sup>13</sup>C NMR (CDCl<sub>3</sub>): δ 142.1, 137.9,

# Supplementary Material (ESI) for Chemical Communications  
# This journal is © The Royal Society of Chemistry 2005

137.1, 133.4, 130.9, 130.3, 128.7, 128.5, 128.3, 127.8, 127.4, 126.9, 126.6, 126.3, 48.5.

Anal. Calcd for C<sub>23</sub>H<sub>19</sub>Cl: C, 83.50; H, 5.79. Found: C, 83.57; H, 5.65.

**Product 3b:** <sup>1</sup>H NMR (250 MHz, CDCl<sub>3</sub>): δ 7.47–7.51 (m, 2H), 7.11–7.36 (m, 12H), 6.30–6.58 (m, 3H), 4.93 (dd, *J* = 9.03 and 8.98 Hz, 1H), 2.32 (s, 3H). <sup>13</sup>C NMR (CDCl<sub>3</sub>): δ 142.3, 138.6, 137.2, 135.1, 133.5, 130.8, 130.4, 129.0, 128.7, 128.5, 127.8, 127.4, 127.4, 126.7, 126.5, 126.3, 48.4, 21.1. Anal. Calcd for C<sub>24</sub>H<sub>21</sub>Cl: C, 83.58; H, 6.14. Found: C, 83.92; H, 6.03.

**Product 3c:** <sup>1</sup>H NMR (250 MHz, CDCl<sub>3</sub>): δ 7.14–7.36 (m, 13H), 6.90–6.97 (m, 1H), 6.32–6.56 (m, 3H), 4.92 (dd, *J* = 8.98 and 8.96 Hz, 1H). <sup>13</sup>C NMR (CDCl<sub>3</sub>): δ 164.6, 160.6, 141.8, 140.0, 136.9, 132.0, 131.1, 129.9, 129.5, 128.8, 128.5, 127.7, 127.5, 126.7, 126.31, 122.1, 115.6, 115.3, 113.9, 113.5, 48.5. Anal. Calcd for C<sub>23</sub>H<sub>18</sub>ClF: C, 79.19; H, 5.20. Found: C, 79.37; H, 5.55.

**Product 3d:** <sup>1</sup>H NMR (250 MHz, CDCl<sub>3</sub>): δ 7.16–7.41 (m, 14H), 6.34–6.61 (m, 2H), 6.09 (d, *J* = 9.28 Hz, 1H), 4.92 (dd, *J* = 9.73 and 9.59 Hz, 1H). <sup>13</sup>C NMR (CDCl<sub>3</sub>): δ 141.8, 138.1, 137.2, 133.0, 131.1, 131.0, 130.0, 129.9, 129.8, 129.5, 128.7, 128.5, 127.8, 127.4, 126.8, 126.7, 126.3, 48.1. Anal. Calcd for C<sub>23</sub>H<sub>18</sub>Cl<sub>2</sub>: C, 75.62; H, 4.97. Found: C, 75.47; H, 4.76.

**Product 3e:** <sup>1</sup>H NMR (250 MHz, CDCl<sub>3</sub>): δ 7.16–7.46 (m, 14H), 6.33–6.57 (m, 3H), 4.91 (dd, *J* = 9.17 and 9.11 Hz, 1H). <sup>13</sup>C NMR (CDCl<sub>3</sub>): δ 141.9, 137.0, 136.8, 132.3, 131.4, 131.0, 129.9, 129.0, 128.8, 128.5, 128.1, 127.7, 127.5, 126.9, 126.3, 122.7, 48.5. Anal. Calcd for C<sub>23</sub>H<sub>18</sub>BrCl: C, 67.40; H, 4.43. Found: C, 67.25; H, 4.36.

**Product 3f:** <sup>1</sup>H NMR (250 MHz, CDCl<sub>3</sub>): δ 7.02–7.52 (m, 14H), 6.37–6.63 (m, 3H), 4.95 (dd, *J* = 9.69 and 9.56 Hz, 1H). <sup>13</sup>C NMR (CDCl<sub>3</sub>): δ 162.5, 157.7, 141.9, 137.1, 133.4,

# Supplementary Material (ESI) for Chemical Communications

# This journal is © The Royal Society of Chemistry 2005

133.3, 131.0, 130.4, 130.1, 130.0, 128.7, 128.5, 128.1, 127.8, 127.4, 127.1, 126.8, 126.3, 124.0, 116.2, 115.8, 48.5. Anal. Calcd for C<sub>23</sub>H<sub>18</sub>ClF: C, 79.19; H, 5.20. Found: C, 79.33; H, 5.17.

**Product 3g:**  $\delta$  7.54–7.59 (m, 2H), 7.21–7.41 (m, 13H), 6.37–6.55 (m, 3H), 4.90 (dd,  $J$  = 8.94 and 8.88 Hz, 1H). <sup>13</sup>C NMR (CDCl<sub>3</sub>):  $\delta$  141.9, 139.7, 137.1, 132.1, 131.0, 130.0, 128.7, 128.5, 128.3, 127.8, 127.4, 126.8, 126.3, 126.1, 51.3. Anal. Calcd for C<sub>23</sub>H<sub>19</sub>Br: C, 73.61; H, 5.10. Found: C, 73.57; H, 5.22.

**Product 3h:** <sup>1</sup>H NMR (250 MHz, CDCl<sub>3</sub>):  $\delta$  7.07–7.46 (m, 14H), 6.34–6.59 (m, 3H), 4.88 (dd,  $J$  = 8.79 and 8.70 Hz, 1H), 2.31 (s, 3H). <sup>13</sup>C NMR (CDCl<sub>3</sub>):  $\delta$  142.0, 138.6, 137.1, 136.9, 131.2, 130.9, 130.1, 128.9, 128.7, 128.5, 127.8, 127.6, 127.4, 126.8, 126.3, 51.3. Anal. Calcd for C<sub>24</sub>H<sub>21</sub>Br: C, 74.04; H, 5.44. Found: C, 73.92; H, 5.09.

**Product 3i:** <sup>1</sup>H NMR (250 MHz, CDCl<sub>3</sub>):  $\delta$  7.17–7.39 (m, 10H), 6.29–6.53 (m, 2H), 5.88 (d,  $J$  = 9.18 Hz, 1H), 4.70 (dd,  $J$  = 8.77 and 8.75 Hz, 1H), 2.47–2.52 (m, 2H), 1.47–1.64 (m, 2H), 1.26–1.38 (m, 2H), 0.92 (t,  $J$  = 7.24 Hz, 3H). <sup>13</sup>C NMR (CDCl<sub>3</sub>):  $\delta$  142.3, 137.2, 130.5, 129.4, 128.6, 128.5, 127.7, 127.3, 126.6, 126.3, 50.4, 41.2, 30.3, 21.6, 13.8. Anal. Calcd for C<sub>21</sub>H<sub>23</sub>Br: C, 70.99; H, 6.52. Found: C, 71.31; H, 6.87.

**Product 3j:** <sup>1</sup>H NMR (250 MHz, CDCl<sub>3</sub>):  $\delta$  7.18–7.39 (m, 10H), 6.30–6.52 (m, 2H), 5.88 (d,  $J$  = 9.30 Hz, 1H), 4.71 (dd,  $J$  = 8.68 and 8.70 Hz, 1H), 2.46–2.51 (m, 2H), 1.56–1.61 (m, 2H), 1.16–1.37 (m, 2H), 0.87 (t,  $J$  = 7.21 Hz, 3H). <sup>13</sup>C NMR (CDCl<sub>3</sub>):  $\delta$  147.4, 142.3, 137.2, 130.5, 129.5, 129.2, 128.6, 128.5, 127.7, 127.3, 126.6, 126.2, 50.3, 41.7, 31.8, 29.3, 28.4, 28.1, 22.7, 14.1. Anal. Calcd for C<sub>25</sub>H<sub>31</sub>Br: C, 72.98; H, 7.59. Found: C, 72.68; H, 7.87.

# Supplementary Material (ESI) for Chemical Communications  
# This journal is © The Royal Society of Chemistry 2005

**Product 3k:**  $^1\text{H}$  NMR (250 MHz,  $\text{CDCl}_3$ ):  $\delta$  6.97–7.33 (m, 9H), 6.05–6.23 (m, 3H), 3.68–3.72 (m, 1H), 1.28 (d,  $J = 6.73$  Hz, 3H).  $^{13}\text{C}$  NMR ( $\text{CDCl}_3$ ):  $\delta$  164.6, 160.7, 137.3, 132.1, 131.9, 131.1, 130.9, 129.7, 129.6, 129.2, 128.6, 128.5, 127.6, 127.2, 126.6, 126.1, 122.0, 115.4, 115.0, 113.7, 113.4, 37.4, 19.7. Anal. Calcd for  $\text{C}_{18}\text{H}_{16}\text{ClF}$ : C, 75.39; H, 5.62. Found: C, 75.28; H, 5.87.

**Product 3l:**  $^1\text{H}$  NMR (250 MHz,  $\text{CDCl}_3$ ):  $\delta$  6.97–7.38 (m, 9H), 6.13–6.25 (m, 3H), 3.63–3.67 (m, 1H), 1.29 (d,  $J = 6.84$  Hz, 3H).  $^{13}\text{C}$  NMR ( $\text{CDCl}_3$ ):  $\delta$  164.4, 160.7, 137.3, 135.6, 131.9, 1129.7, 129.6, 129.3, 128.5, 127.6, 127.3, 126.1, 126.2, 115.4, 115.1, 115.0, 114.6, 40.3, 19.6. Anal. Calcd for  $\text{C}_{18}\text{H}_{16}\text{BrF}$ : C, 65.27; H, 4.87. Found: C, 65.38; H, 4.97.

**Product 3m:**  $^1\text{H}$  NMR (250 MHz,  $\text{CDCl}_3$ ):  $\delta$  7.15–7.55 (m, 10H), 6.08–6.50 (m, 3H), 3.63–3.70 (m, 1H), 1.28 (d,  $J = 6.85$  Hz, 3H).  $^{13}\text{C}$  NMR ( $\text{CDCl}_3$ ):  $\delta$  139.8, 137.4, 134.5, 132.9, 132.2, 129.4, 18.5, 128.2, 127.6, 127.2, 26.6, 126.2, 124.7, 40.3, 19.7. HRMS for  $\text{C}_{18}\text{H}_{17}\text{Br}$ : 312.0514. Found: 312.0518.

**Product 3n:**  $^1\text{H}$  NMR (250 MHz,  $\text{CDCl}_3$ ):  $\delta$  7.20–7.61 (m, 15H), 6.01–6.74 (m, 5H), 4.67 (dd,  $J = 8.97$  and  $8.79$  Hz, 1H).  $^{13}\text{C}$  NMR ( $\text{CDCl}_3$ ):  $\delta$  142.1, 137.9, 137.3, 137.1, 134.5, 133.3, 132.0, 131.4, 130.7, 129.5, 128.6, 128.3, 127.7, 127.4, 126.5, 126.3, 48.4. Anal. Calcd for  $\text{C}_{25}\text{H}_{21}\text{Cl}$ : C, 84.14; H, 5.93. Found: C, 83.92; H, 6.28.

**Product 3o:**  $^1\text{H}$  NMR (250 MHz,  $\text{CDCl}_3$ ):  $\delta$  7.23–8.22 (m, 17H), 6.36–6.58 (m, 3H), 5.06 (dd,  $J = 8.79$  and  $8.71$  Hz, 1H).  $^{13}\text{C}$  NMR ( $\text{CDCl}_3$ ):  $\delta$  144.3, 139.8, 136.7, 133.6, 133.4, 130.4, 128.8, 128.7, 128.5, 128.5, 128.3, 127.8, 127.4, 126.8, 126.6, 126.3, 126.0, 125.7, 125.6, 123.6, 48.9. HRMS for  $\text{C}_{27}\text{H}_{21}\text{Cl}$ : 380.1332. Found: 380.1337.
